# Supplementary material for: A comparative metabolomic study on desi and kabuli chickpea (Cicer arietinum L.) genotypes under rainfed and irrigated field conditions
Source: PubMed Central journal article supplement (PMC7434909; doi:10.1038/s41598-020-70963-6), 2020-08-18
Supplement: 41598_2020_70963_MOESM1_ESM.pdf [file 41598_2020_70963_MOESM1_ESM.pdf]

## Supplementary Material

### **A Comparative Metabolomic Study on Desi and Kabuli Chickpea (*Cicer arietinum* L.) genotypes under Rainfed and Irrigated Field Conditions**

Zaib Un Nisa<sup>a</sup>, Anjuman Arif<sup>c</sup>, Muhammad Qandeel Waheed<sup>c</sup>, Tariq Mahmood Shah<sup>c</sup>, Ayesha Iqbal<sup>b</sup>, Amna Jabbar Siddiqui<sup>b</sup>, Muhammad Iqbal Choudhary<sup>a,b,d</sup>, Hesham R. El-Seedi<sup>e,f</sup>, Syed Ghulam Musharraf<sup>a,b\*</sup>

<sup>a</sup> *H.E.J. Research Institute of Chemistry, International Center for Chemical and Biological Sciences, University of Karachi, Karachi-75270, Pakistan*

<sup>b</sup> *Dr. Panjwani Center for Molecular Medicine and Drug Research, International Center for Chemical and Biological Sciences, University of Karachi, Karachi-75270, Pakistan*

<sup>c</sup> *Nuclear Institute for Agriculture & Biology (NIAB), Faisalabad-38000, Pakistan*

<sup>d</sup> *Department of Biochemistry, Faculty of Science, King Abdulaziz University, Jeddah-21589, Saudi Arabia*

<sup>e</sup> *Pharmacognosy Group, Department of Medicinal Chemistry, Uppsala University, Biomedical Centre, Box 574, 75 123 Uppsala, Sweden*

<sup>f</sup> *Alrayan Medical College, Medina 42541, Kingdom of Saudi Arabia*

\* Corresponding author. Tel.: +92 21 34824924-5; 34819010; fax: + 92 21 34819018-9.

E-mail address: musharraf1977@yahoo.com

**Table S1:** Environment description of control and drought experiments during October 2016 to March 2017.

| Experiment                                       | Environment       | October | November | December | January | February | March | Average |
|--------------------------------------------------|-------------------|---------|----------|----------|---------|----------|-------|---------|
|                                                  |                   |         |          |          |         |          |       |         |
| <b>Control (Irrigated):</b>                      |                   |         |          |          |         |          |       |         |
| <i>Faisalabad</i>                                | <b>Temp (min)</b> | 23      | 17       | 13       | 10      | 13       | 17    | 15      |
| Latitude: 31.450                                 | <b>Temp (max)</b> | 37      | 29       | 24       | 24      | 26       | 32    | 29      |
| Longitude: 73.135                                | <b>Sunny days</b> | 31      | 28       | 31       | 31      | 25       | 22    | 28      |
| Soil type:<br>Silt loam or very fine sandy loam* | <b>Rain fall</b>  | 0       | 0        | 0        | 13      | 84       | 32    | 22      |
|                                                  | <b>Humidity</b>   | 17      | 23       | 24       | 26      | 35       | 33    | 26      |
| <b>Drought (Rainfed):</b>                        |                   |         |          |          |         |          |       |         |
| <i>Kallur kot</i>                                | <b>Temp (min)</b> | 25      | 17       | 13       | 11      | 13       | 20    | 16      |
| Latitude: 32.156                                 | <b>Temp (max)</b> | 36      | 27       | 23       | 22      | 24       | 31    | 27      |
| Longitude: 71.272                                | <b>Sunny days</b> | 31      | 29       | 30       | 31      | 22       | 20    | 27      |
| Soil type:<br>Sandy loam**                       | <b>Rain fall</b>  | 0       | 2        | 0        | 0       | 5        | 9     | 2       |
|                                                  | <b>Humidity</b>   | 15      | 23       | 21       | 22      | 34       | 34    | 25      |

Temperature is measured in °C (minimum and maximum), average rainfall in mm and humidity in %.

\*Silt soils are fertile, light but moisture-retentive and easily compacted.

\*\*Sandy loams are capable of quickly draining excess water and usually deficient in micronutrients, especially zinc and iron.

**Table S2:** Confusion matrix of model generated on data of rainfed and control desi type of plants (26 lines).

|                  | Control Predicted | Rainfed predicted | Accuracy |
|------------------|-------------------|-------------------|----------|
| True control     | 26                | 0                 | 100.00   |
| True drought     | 0                 | 25                | 100.00   |
| Overall Accuracy |                   |                   | 100.00   |

**Table S3:** Confusion matrix of model generated on data of rainfed and control kabuli type of plants (18 lines).

|                  | Control Predicted | Rainfed predicted | Accuracy |
|------------------|-------------------|-------------------|----------|
| True control     | 16                | 1                 | 94.11    |
| True drought     | 0                 | 18                | 100.00   |
| Overall Accuracy |                   |                   | 97.14    |

**Table S4.** List of altered metabolites in desi and kabuli groups of chickpea plant samples under rainfed condition *versus* irrigated control.

| Cluster name                                                        | Cluster size | p-values | FDR      | Key compound                | Altered metabolites | Increased | Decreased | Increased ratio | Altered Ratio |
|---------------------------------------------------------------------|--------------|----------|----------|-----------------------------|---------------------|-----------|-----------|-----------------|---------------|
| <b>Cluster level enrichment result of desi chickpea genotype</b>    |              |          |          |                             |                     |           |           |                 |               |
| Dicarboxylic Acids                                                  | 4            | 2.2E-20  | 3.3E-20  | Threonic acid               | 4                   | 1         | 3         | 0.2             | 1             |
| Sugar Alcohols                                                      | 4            | 2.2E-20  | 3.3E-20  | Xylitol                     | 4                   | 2         | 2         | 0.5             | 1             |
| Hexoses                                                             | 4            | 6.3E-14  | 6.3E-14  | $\alpha$ -D-Glucopyranoside | 4                   | 3         | 1         | 0.8             | 1             |
| <b>Cluster level enrichment result of kabuli chickpea genotypes</b> |              |          |          |                             |                     |           |           |                 |               |
| Monosaccharides                                                     | 4            | 3.2E-09  | 9.5E-09  | Mannofuranoside             | 4                   | 0         | 4         | 0               | 1             |
| Disaccharides                                                       | 3            | 1.10E-08 | 1.60E-08 | Maltose                     | 3                   | 0         | 3         | 0               | 1             |
| Dicarboxylic Acids                                                  | 4            | 8.40E-08 | 8.40E-08 | Oxalic acid                 | 4                   | 0         | 4         | 0               | 1             |

**Figure S1:** Box plot of mean (A) and individual value (B) of chickpea genotypes in non-stressed (control) and stressed (drought) conditions

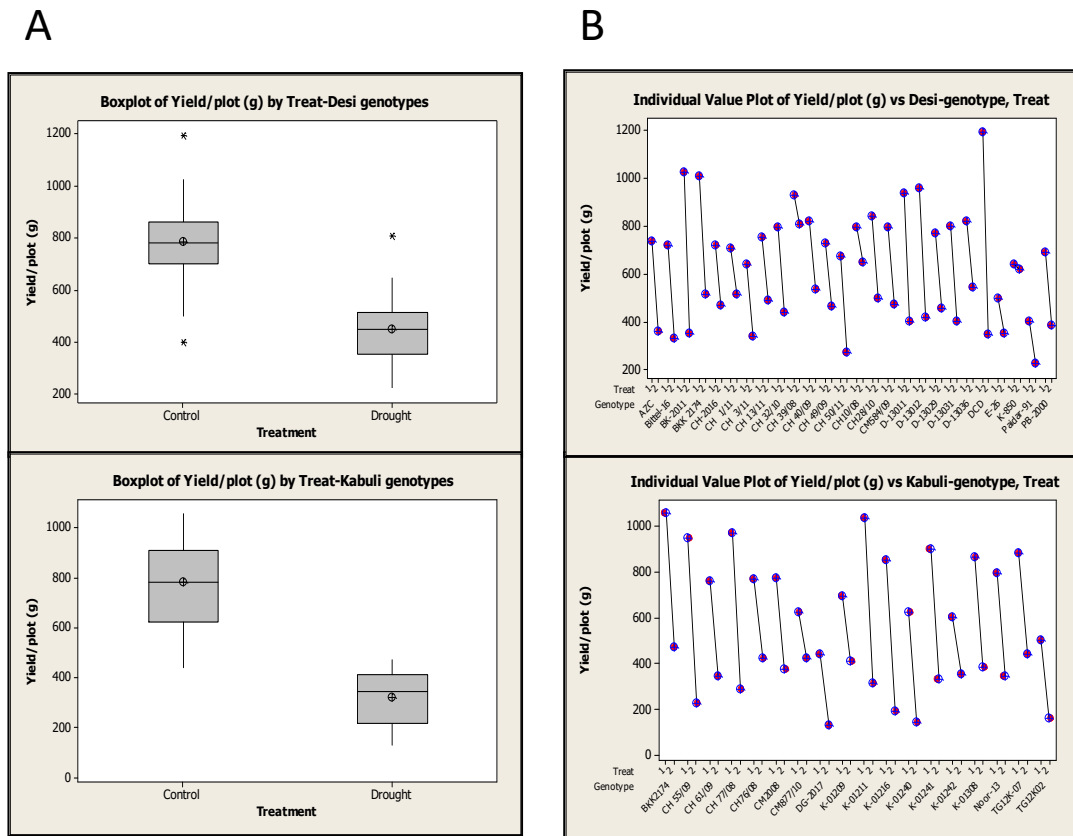

**Figure S2:** A diagrammatic representation of sample collection for metabolite analysis

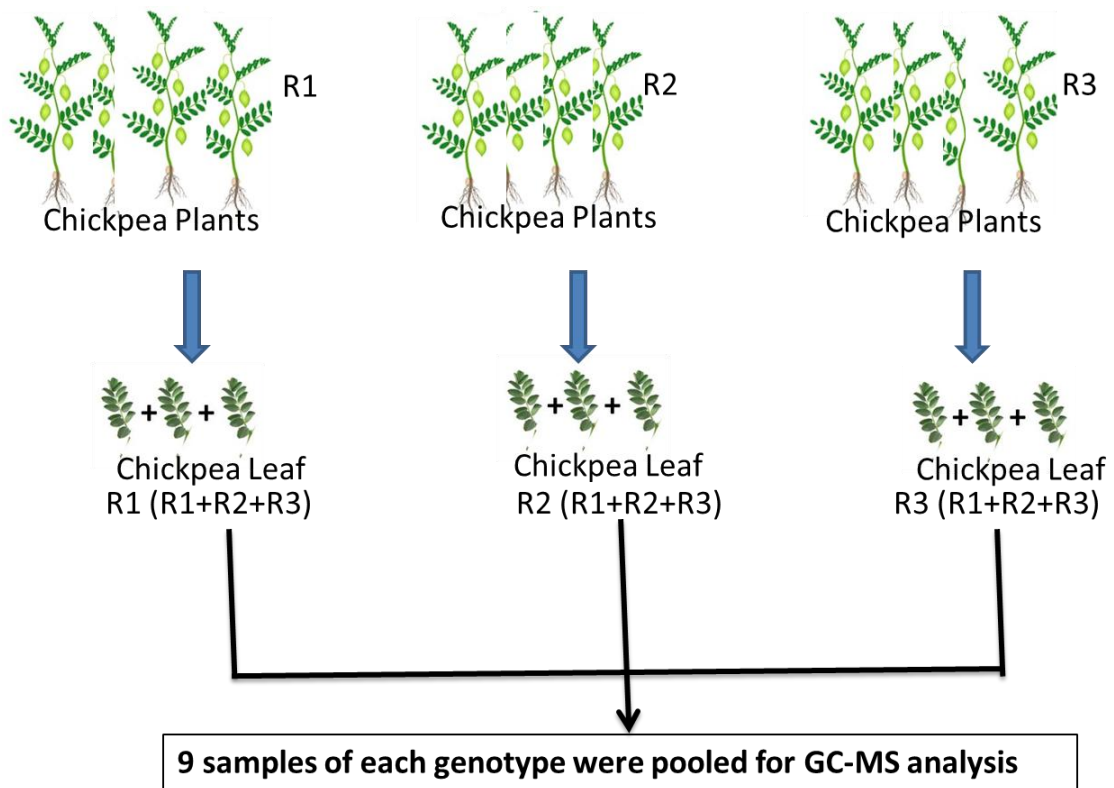

**Figure S3:** Pathways generated by list of metabolites discriminating between irrigated controls and drought stressed samples of chickpea plants.

Starch and sucrose metabolism [1]

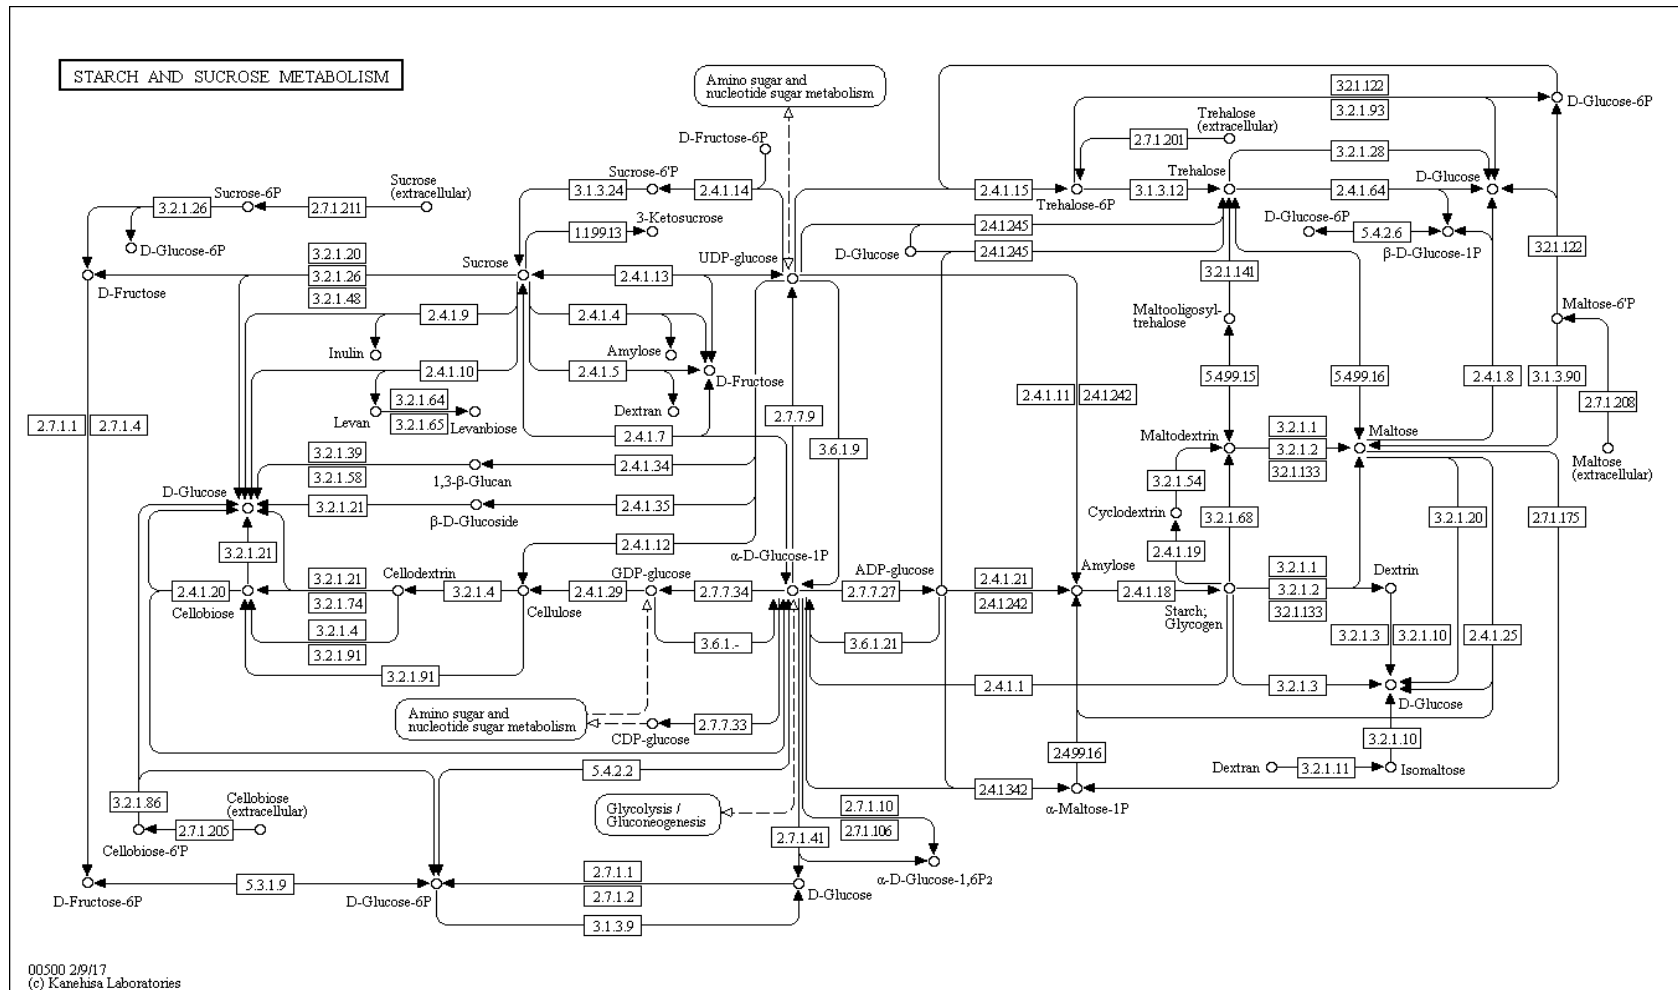

**Figure S4: Citrate cycle (TCA cycle) [1].**

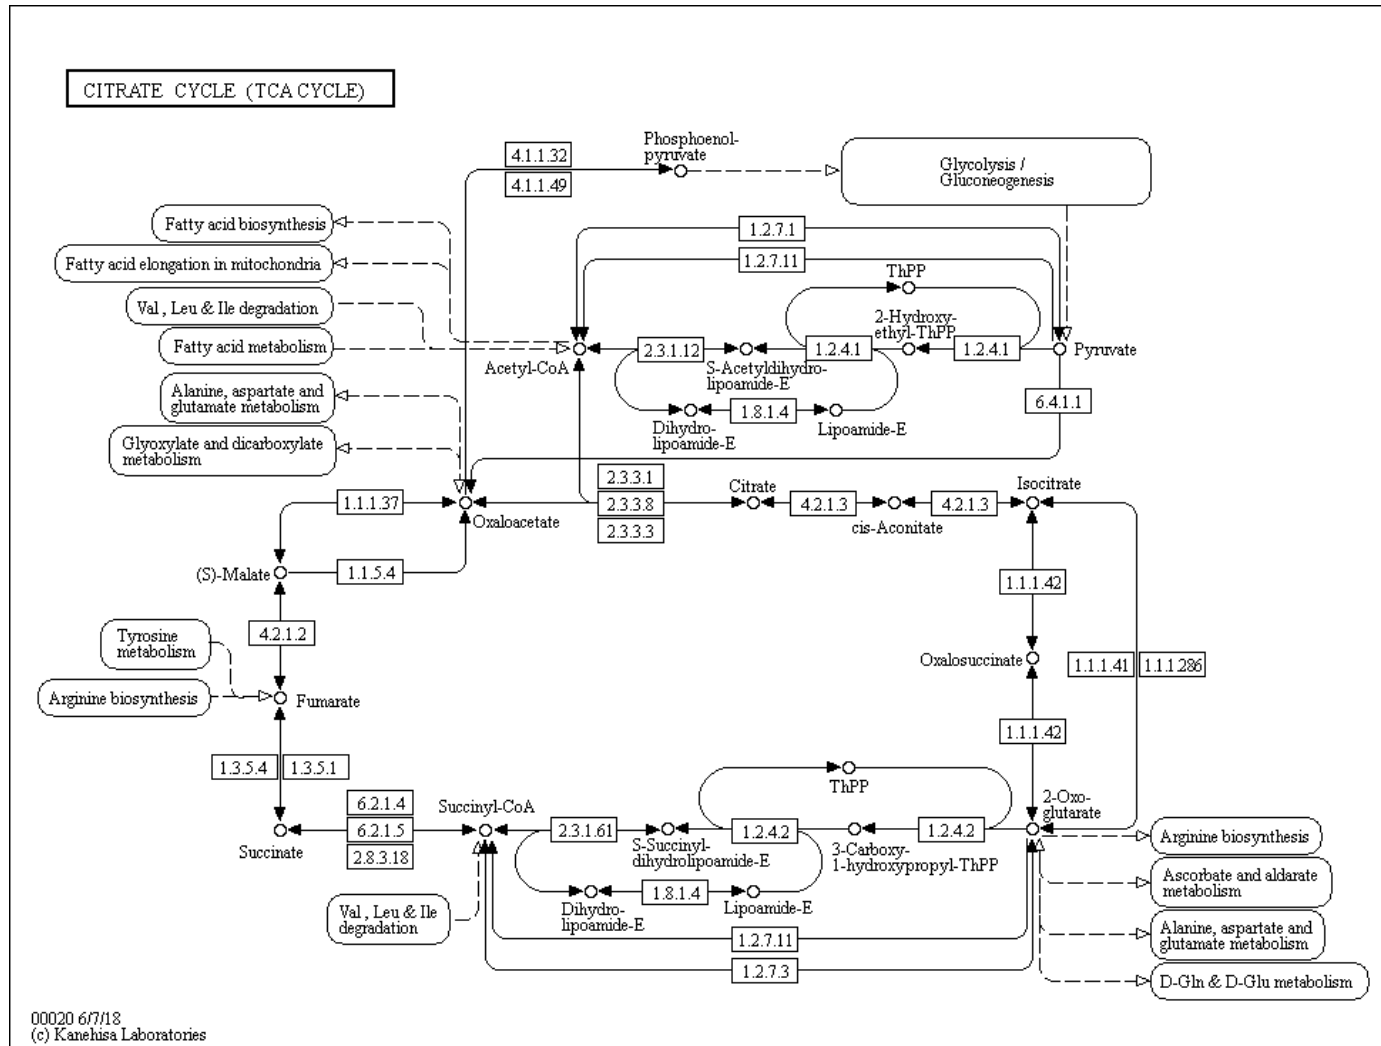

**Figure S5: Inositol Phosphate Metabolism [1]**

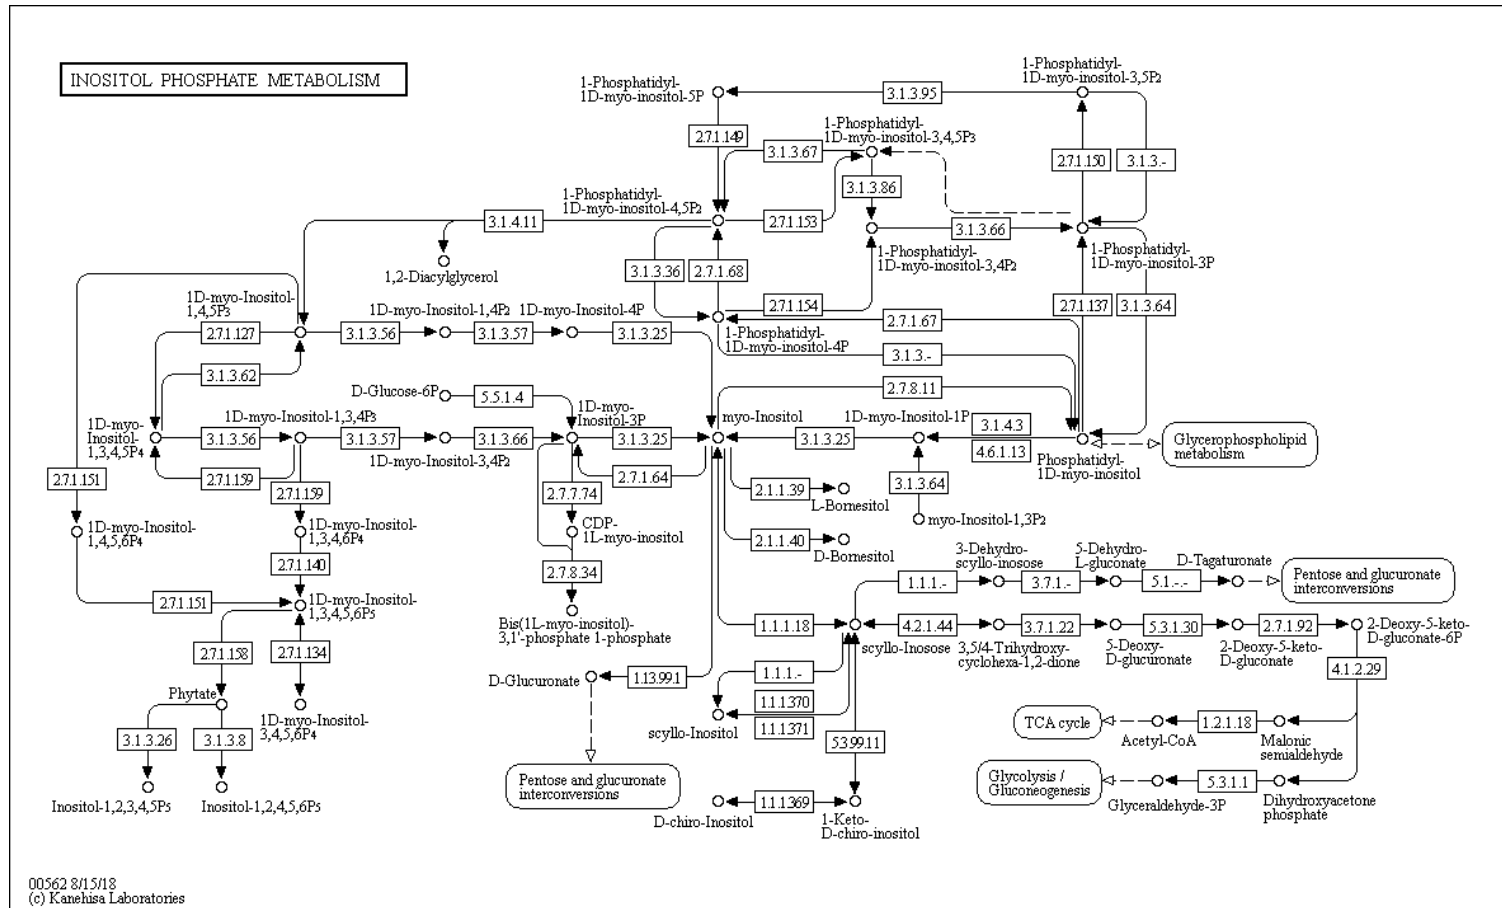

**Reference**

[1] Kanehisa M, Furumichi M, Tanabe M, Sato Y, Morishima K. KEGG: new perspectives on genomes, pathways, diseases and drugs. *Nucleic Acids Res* 2017;45:D353-D61.
